# Supplementary material
Source: PubMed Central journal article supplement (PMC4941099)
Supplement: NIHMS713473-supplement-supplemental_material.pdf [file NIHMS713473-supplement-supplemental_material.pdf]

## SUPPLEMENTAL MATERIAL

Roster of clinician volunteers for Get with the Guidelines Heart Failure.

Clyde Yancy, MD

Gregg Fonarow, MD

Paul Heidenreich, MD

Adrian Hernandez, MD

Ileana Pina, MD

Nancy Albert, PhD, CCNS

Warren Laskey, MD

David Whellan, MD

Deepak Bhatt, MD

Larry Allen, MD

Adam DeVore, MD

Srinivas Murali, MD

Lee Goldberg, MD, Heart Failure Society of America representative

Pam Peterson, MD, Heart Failure Society of America representative

Debra Moser, MD, Heart Failure Society of America representative

Nita Reigle, MSN, ACNP, American Association of Heart Failure Nurses representative
